# Supplementary material for: Involvement of fatty acid synthase in dengue virus infection
Source: Springer Nature journal article supplement (doi:10.1186/s12985-017-0685-9), 2017-02-13
Supplement: MOESM1 [file 12063252]

## Additional File 1

### Involvement of fatty acid synthase in dengue virus infection

Natthida Tongluan<sup>a</sup>, Suwipa Ramphan<sup>a</sup>, Phitchayapak Wintachai<sup>a</sup>, Janthima Jaresitthikunchai<sup>b</sup>, Sarawut Khongwichit<sup>a</sup>, Nitwara Wikan<sup>a</sup>, Supoth Rajakam<sup>a</sup>, Sutee Yoksan<sup>a,c</sup>, Nuttaporn Wongsiriroj<sup>a</sup>, Sittiruk Roytrakul<sup>b</sup> and Duncan R. Smith<sup>a,c\*</sup>

<sup>a</sup>Institute of Molecular Biosciences, Mahidol University, Bangkok, 73170, Thailand

<sup>b</sup>National Center for Genetic Engineering and Biotechnology (BIOTEC), National Science and Technology Development Agency, Pathum Thani, 12120, Thailand

<sup>c</sup>Center for Emerging and Neglected Infectious Diseases, Mahidol University, Bangkok, 73170, Thailand

**Table S1. List of gene specific primers**

| Gene name                                                         | Primer sequences                                                               | Tm   |
|-------------------------------------------------------------------|--------------------------------------------------------------------------------|------|
| Acetyl-CoA carboxylase alpha1 (ACC1)                              | Forward: 5'-GCACCTGCTACTATTGCTACTC-3'<br>Reverse: 5'-CAGTCCCAGCACTCACATAAC-3'  | 62°C |
| Fatty acyl CoA oxidase (AOX)                                      | Forward: 5'-CTTGCCCAGCTCATCACTAA-3'<br>Reverse: 5'-CCGATGTCACCAACGGTAAT-3'     | 62°C |
| Adipose triglyceride lipase (ATGL)                                | Forward: 5'-TGTCTGCAGCGGTTTCAT-3'<br>Reverse: 5'-CTCATAGAGTGGCAGGTTGTC-3'      | 62°C |
| Carnitine palmitoyltransferase I (CPT1)                           | Forward: 5'-CCTTCCCATTCGTAGCCTTT-3'<br>Reverse: 5'-CTTGCCCATGTCCTTGTAGT-3'     | 62°C |
| Diglyceride acyltransferase 1 (DGAT1)                             | Forward: 5'-CCTACCGCGATCTCTACTACTT-3'<br>Reverse: 5'-GGGTGAAGAACAGCATCTCAA-3'  | 62°C |
| Fatty acid synthase gene (FASN)                                   | Forward: 5'-TGTCTGCGGAGGAGTGTA-3'<br>Reverse: 5'-CTGCTCCACGAACTCAAACA-3'       | 62°C |
| Medium-chain acyl-CoA dehydrogenase (MCAD)                        | Forward : 5'-GTAGCCCGTGAACACATTGA-3'<br>Reverse : 5'-TTCTGGAGCTGAAACAGTGG-3'   | 62°C |
| Peroxisome proliferator-activated receptor alpha (PPAR $\alpha$ ) | Forward: 5'-GGAGCTATGGTATGTGGTTCAG-3'<br>Reverse: 5'-CATCTGGTCTGTTGGTCTGTT-3'  | 62°C |
| Stearoyl-CoA desaturase-1 (SCD1)                                  | Forward: 5'-CCTGCAGAATGGAGGAGATAAG-3'<br>Reverse: 5'-GCCTTCCTTATCCTTGTAGGTG-3' | 62°C |
| Sterol regulatory element-binding protein-1c (SREBP1c)            | Forward: 5'-CGCTCCTCCATCAATGACAA-3'<br>Reverse: 5'-GTGTTGCAGAAAGCGAATGTAG-3'   | 62°C |
